# Supplementary material for: Structures, biosynthetic pathways, and biological significance of bacterial aryl-heterocycle metallophores with emphasis on yersiniabactin-type derivatives
Source: Royal Society of Chemistry journal article supplement (doi:10.1039/d5np00045a), 2025-01-01
Supplement: d5np00045a2.xlsx [file d5np00045a2.xlsx]

## Sheet: Table S1B_Aryl-Heterocycle BGCs
Compound_Name	NCBI_ACC	Origin	Strain	DOI	Sequence available	MIBIG[reasonable quality]	Published BGC	Siderophore	Antismash metallophore type predicted	Biosynthesis known	CA_domains_extracted	Comments	Notes
2-Hydroxybenzamide		Streptomyces sp.	RM-14-6		N	N	N	N		N	NA
Acinetobactin	AB101202	Acinetobacter baumannii	ATCC19606	10.1099/mic.0.27141-0	Y	Y	Y	Y	Y	Y	Y		Proposed biosynthesis 10.3389/fmicb.2021.752070
Aerugine	FR845719	Streptomyces venezuelae	ATCC 10712	10.1039/c6sc03533g	N			Y		Y	NA		part of Watasemycin pathway; siderophore proof (10.1021/acsinfecdis.0c00897)
Aeruginoic acid		Pseudomonas aeruginosa			N			Y		N	NA	Probably a shunt product of Pyochelin biosynthesis (as in Burkholderia cenocepacia, 10.1038/s41598-021-00421-4)
Agrobactin	LMVK01000001	Agrobacterium tumefaciens	B6	10.1266/ggs.77.137	Y	Y	Y	Y	Y	N	Y
Amamistatin	NZ_BDAY01000018	Nocardia altamirensis	DSM 44997	10.3762/bjoc.18.40	Y	N	N	Y	Y	N	Y
Amychelin	NZ_CP024894	Amycolatopsis sp.	AA4	10.1021/ja203577e	Y	Y	Y	Y	Y	Y	Y
Anachelin	AP018166	Anabaena cylindrica	PCC 7122	10.1186/1471-2164-15-977	Y	Y	Y	Y	Y	N	Y	Only total synthesis publications and this putative biosynthesis 10.1016/j.tet.2004.07.105 were found
Anguibactin	AY312585	Vibrio anguillarum	775	10.1002/mbo3.65	Y	Y	Y	Y	Y	Y	Y
Anthrochelin	JAARLZ010000002	Luteibacter anthropi	DSM23190	10.1002/cbic.202300322	Y	Y	Y	Y	Y	Y	Y	MIBIG status pending, but very good quality	Sorangibactin is the same structure OQ368584 from Sorangiineae strain MSr11367
Asterobactin		Nocardia asteroides	IFM0959	10.7164/antibiotics.55.593	N	N	N	Y	N	N	NA
Attinimicin	NZ_JAHLJD000000000	Pseudonocardia sp.	ICBG1293	10.1021/acscentsci.0c00978	Y	N	Y	Y	Y	Y	Y
BE-32030		Nocardia sp.	A32030	10.7164/antibiotics.50.815	N	N	N	N	N	N	NA
Brasilibactin		Nocardia brasiliensis	IFM 0995	10.1021/np0496385	N	N	N	Y	N	N	NA
Cahuitamycin	KU363800	Streptomyces gandocaensis	12620-H2	10.1038/ncomms10710	Y	Y	Y	Y	Y	Y	Y
Carboxymycobactin		Mycobacterium smegmatis	NCIMB 8548	10.1023/A:1009249122146	N	N	N	Y	N	N	NA	Part of the Mycobactin biosynthesis
Cyanochelin	CP003549	Rivularia sp.	PCC 7116	10.1128/AEM.03128-20	Y	Y	Y	Y	Y	N	Y
Dihydroaeruginoic Acid		Pseudomonas fluorescens	PFM2	10.1021/np50111a002	N	N	N	N	N	N	NA	Part of the Pyochelin biosynthesis process
Ecteinamine	JAHOPD010000020	Micromonospora sp.	WMMB482	10.1021/jacs.2c06410	Y	N	Y	N	N	Y	Y
Enantio-Pyochelin		Pseudomonas fluorescens	CHA0	10.1074/jbc.M707039200	N	N	N	Y	N	N	NA	Part of the Pyochelin biosynthesis process
Escherichelin		Escherichia coli	UTI89	10.1172/JCI92464	N	N	N	Y	N	N	NA	Part of the Yersiniabactin biosynthesis process
Fimsbactin	NC_009085	Acinetobacter baumannii	ATCC17978	10.1002/cbic.201200764	Y	Y	Y	Y	Y	Y	NA		Starter A-domain not annotated
Fluvibactin		Vibrio fluvialis	AQ 0012		N	N	N	Y		N	NA
Formobactin		Nocardia sp.	ND20		N	N	N	Y		N	NA
Frankobactin	NZ_JADBID010000001	Parafrankia sp.	CH37	10.1021/acs.jnatprod.0c01291	Y	Y	Y	Y	Y	Y	Y
Karamomycin		Nonomuraea sp.	GW58/450	10.1021/acs.jnatprod.8b00928	N	N	N	N	N	N	NA
Leptochelin	JAXSQW000000000	Leptothoe sp.	ISB3NOV94-8A	10.1021/jacs.4c05399	Y	N	Y	Y	Y	Y	Y
Madurastatin	NZ_CP041244	Actinomadura sp.	WMMA1423	10.1021/acs.orglett.9b02159	Y	Y	Y	Y	Y	Y	Y
Massiliachelin	CP012201	Massilia sp.	NR 4-1	10.3762/bjoc.15.128	Y	Y	Y	Y	N	Y	Y
Micacocidin	AL646052	Ralstonia solanacearum	GMI1000	10.1128/AEM.05198-11	Y	Y	Y	Y	N	Y	Y
Mycobactin	AL123456	Mycobacterium tuberculosis	H37Rv	10.1016/S1074-5521(98)90291-5	Y	Y	Y	Y	Y	Y	Y
Nigribactin	NZ_JXXT01000002	Vibrio nigripulchritudo	S2604	10.3390/md10112584	Y	N	N	Y	Y	N	Y
Nocardichelin		Nocardia sp.	Acta 3026		N	N	N	Y		N	NA
Nocardimicin	PQ621783	Nocardia sp.	L-016	10.1038/ja.2005.77	Y	N	Y	Y	Y	Y	NA	Only Main cluster genes identified; nocF (starter NRPS) is not available
Nocobactin	AP006618	Nocardia farcinica	IFM 10152	10.1128/JB.00897-10	Y	Y	Y	Y	Y	Y	Y		sequence found over database linked at (10.1073/pnas.0406410101); More derivatives from LWGR01000021.1 (10.1002/cbic.202000062)
Oxachelin		Streptomyces sp.			N	N	N	Y		N	NA
Parabactin	CP000489	Paracoccus denitrificans	PD1222	10.1073/pnas.1401734111	Y	Y	N	Y	Y	N	NA
Photobactin	AY042783	Photorhabdus luminescens	NS414	10.1128/AEM.69.8.4706-4713.2003	Y	Y	Y	Y	Y	Y	Y	Base structure biosynthesis is known
Photoxenobactin	NIBV00000000	Xenorhabdus szentirmaii	DSM 16338	10.1038/s41557-022-00923-2	Y	N	Y	N	Y	Y	Y
Piscibactin	KP100338	Photobacterium damselae subsp. piscicida	DI21	10.1128/AEM.01580-15	Y	Y	Y	Y	Y	Y	Y
Pseudochelin A	JAXGFZ000000000	Pseudoalteromonas piscicida	EM138	10.1021/acs.jnatprod.4c00376	Y	Y	Y	Y	Y	N	Y	Identical to Myxochelin biosynthesis BGC
Pseudomonine	EF484930	Pseudomonas fluorescens	AH2	10.1128/JB.183.6.1909-1920.2001	Y	Y	Y	Y	Y	Y	Y		Second half of the cluster? MIBIG: EF484930
Pseudonochelin	JAKKDO010000003	Pseudonocardia sp.	WMMC193	10.1021/acs.orglett.2c01408	Y	N	Y	Y	Y	Y	Y
Pulicatin		Streptomyces sp.	CP32	10.1021/np100588c	N			N		N	NA	Strain was only 16S sequenced
Pyochelin	CP012982	Burkholderia cepacia	ATCC 25416	10.3389/fcimb.2017.00460	Y	Y	Y	Y	Y	Y	Y		Publication supp. Table 3; Pseudomonas aeruginosa PAO1 published sequences are on contig edges
Pyonitrin		Pseudomonas protegens		10.1021/jacs.9b09739	N	N	N	N	N	N	NA	Biosynthesis is a coupled mechanism of Pyochelin and Pyrrolnitrin
Serratiochelin	CP007439	Serratia plymuthica	V4	10.1021/ja304941d	Y	N	Y	Y	Y	Y	Y
Sorangibactin	OQ368584	Pendulispora rubella	MSr11367	10.1021/acschembio.3c00063	Y	Y	Y	Y	Y	Y	Y	MIBIG status pending	Reclassified orig. Sorangiineae strain MSr11367 (10.1016/j.chempr.2024.04.019); Same structures as Anthrochelin
Spoxazomicin		Streptomyces sp.	RM-14-6		N	N	N	N		N	NA
Terpenibactin	LWGR01000021	Nocardia terpenica	IFM 0406	10.1002/cbic.202000062	Y	Y	Y	Y	Y	N	Y
Tetroazolemycin	JAHSTE010000001	Streptomyces olivaceus	FXJ8.012	10.3390/md11051524	Y	N	N	Y	Y	N	Y
Thiazostatin	FR845719	Streptomyces venezuelae	ATCC 10712	10.1039/c6sc03533g	N			N		Y	NA		part of Watasemycin pathway
Transvalencin Z		Nocardia transvalensis	IFM 10065	10.1038/ja.2006.53	N	N	N	N	N	N	NA
Ulbactin	LR134338	Brevibacillus brevis	NCTC2611	10.1016/j.genrep.2016.10.006	Y	N	N	Y	Y	N	Y	Genetic information from Brevibacillus brevis NCTC2611 --> Cluster not published so far, copied approach from Büttner 2023 10.1002/cbic.202300322
Uniformamide	NZ_JABELX010000001	Nocardia uniformis	JCM3224	10.1021/acs.orglett.2c02092	Y	N	Y	N	N	N	Y
Vibriobactin	U52150	Vibrio cholerae	MBG14	10.1128/jb.179.22.7055-7062.1997	Y	Y	Y	Y	Y	N	Y		VibF in another cluster: AF030977
Vulnibactin	AE016796	Vibrio vulnificus	CMCP6	10.3389/fmicb.2014.00001	Y	Y	Y	Y	Y	N	Y
Watasemycin	FR845719	Streptomyces venezuelae	ATCC 10712	10.1039/c6sc03533g	Y	Y	Y	N	Y	Y	Y
Yersiniabactin	AF091251	Yersinia pestis	KIM6+	10.1016/s1074-5521(98)90115-6	Y	Y	Y	Y	Y	Y	Y
