# Supplementary material for: Structures, biosynthetic pathways, and biological significance of bacterial aryl-heterocycle metallophores with emphasis on yersiniabactin-type derivatives
Source: Royal Society of Chemistry journal article supplement (doi:10.1039/d5np00045a), 2025-01-01
Supplement: d5np00045a3.xlsx [file d5np00045a3.xlsx]

## Sheet: Table S8_Pathogens
Compound_Name	MS val.	NMR val.	16S	Origin	Strain	DOI	Pathogen	Siderophore	Note_type-of-pathogen	Bioactivity	Other notes
Madurastatin	P	P	ꭗ	Actinomadura madurae	IFM 0745	10.7164/antibiotics.57.125	Y	Y	Human
Pseudomonine	P	P	P	Pseudomonas fluorescens	AH2	10.1128/JB.183.6.1909-1920.2001	N	Y			plant growth-promoting rhizobacterium, could be a rare human pathogen ( 10.1128/CMR.00044-14)
Anachelin	P	P	ꭗ	Anabaena cylindrica	PCC 7122	10.1515/znc-2000-9-1002	N	Y			10.1186/1471-2164-15-977
Yersiniabactin	P	ꭗ	P	Yersinia pestis	KIM6+	10.1016/s1074-5521(98)90115-6	Y	Y	Human
Piscibactin	P	ꭗ	~	Photobacterium damselae subsp. piscicida	DI21	10.1128/AEM.01580-15	Y	Y	Fish		Only part of the 16S sequence available
Pyochelin	ꭗ	ꭗ	P	Pseudomonas aeruginosa	PAO1	10.1128/jb.137.1.357-364.1979	Y	Y	Human
Micacocidin	P	P	P	Ralstonia solanacearum	GMI1000	10.1128/AEM.05198-11	Y	Y	Plant		Also produced in Pseudomonas, where pathogenicity was not mentioned
Anguibactin	P	P	P	Vibrio anguillarum	775	10.1128/jb.167.1.57-65.1986	Y	Y	Fish
Ulbactin	P	P	P	Brevibacillus sp.	TP-B0800	10.1021/acs.orglett.6b00531	N	Y
Massiliachelin	P	P	P	Massilia sp.	NR 4-1	10.3762/bjoc.15.128	N	Y			Epimer of Agrochelin
Thiazostatin	P	P	ꭗ	Streptomyces tolurosus	1368-MT1	10.7164/antibiotics.42.1526	N	N
Watasemycin	P	P	ꭗ	Streptomyces sp.	TP-A0597	10.7164/antibiotics.55.249	N	N
Pulicatin	P	P	P	Streptomyces sp.	CP32	10.1021/np100588c	N	N
Aerugine	P	P	P	Pseudomonas aeruginosa	590	10.1007/BF00597805	Y	Y	Human
Yersiniabactin	P	P	ꭗ	Yersinia enterocolitica	H1852	10.1002/jlac.1995199510243	Y	Y	Human
Enantio-Pyochelin	P	P	P	Pseudomonas fluorescens	CHA0	10.1074/jbc.M707039200	N	Y
Dihydroaeruginoic Acid	P	P	ꭗ	Pseudomonas fluorescens	PFM2	10.1021/np50111a002	N	N		Antibiotic
Mycobactin	P	P	ꭗ	Mycobacterium paratuberculosis	NADC18	https://link.springer.com/article/10.1007/BF01572600	Y	Y	Human		Only part of the 16S sequence available; Mycobactin and Carboxymycobactin listed separately even though they belong to the same uptake mechanism
Carboxymycobactin	P	P	~	Mycobacterium smegmatis	NCIMB 8548	10.1023/A:1009249122146	N	Y			Now renamed to Mycolicibacterium smegmatis
Formobactin	P	P	ꭗ	Nocardia sp.	ND20	10.7164/antibiotics.49.839	N	Y
Amamistatin	P	P	P	Nocardia altamirensis	DSM 44997	10.3762/bjoc.18.40	N	Y		Antiproliferation	Strain identifier NBRC 108246
Amamistatin	P	P	ꭗ	Nocardia asteroides	SCRC-A2359	10.1016/S0040-4020(00)00591-3	N	Y		Antiproliferation
Nocobactin	P	P	P	Nocardia farcinica	IFM 10152	10.1128/JB.00897-10	Y	Y	Human
Brasilibactin	P	P	P	Nocardia brasiliensis	IFM 0995	10.1021/np0496385	Y	Y	Human	Cytotoxic	Strain identifier DSM 44924
BE-32030	P	P	ꭗ	Nocardia sp.	A32030	10.7164/antibiotics.50.815	N	N		Antiproliferation
Nocardimicin	P	P	ꭗ	Nocardia sp.	TP-A0674	10.1021/np050091j	N	Y		Muscarinic receptor binding inhibitor
Nocardimicin	P	P	P	Nocardia nova	JCM 6044	10.1038/ja.2005.77	N	Y		Muscarinic receptor binding inhibitor	Strain identifier NBRC 15556
Transvalencin Z	P	P	ꭗ	Nocardia transvalensis	IFM 10065	10.1038/ja.2006.53	Y	N	Human	Antimicrobial
Oxachelin	ꭗ	ꭗ	ꭗ	Streptomyces sp.	GW9/1258	10.1038/ja.2006.88	N	Y		Antifungal	Article offline; alternative source in Streptomyces sp. RM-14-6
Oxachelin	P	P	P	Streptomyces sp.	RM-14-6	10.1021/acs.jnatprod.6b00948	N	Y		Antifungal
Amychelin	P	P	P	Amycolatopsis sp.	AA4	10.1021/ja203577e	N	Y		Antibacterial
Cahuitamycin	P	P	P	Streptomyces gandocaensis	12620-H2	10.1038/ncomms10710	N	Y		Antibacterial	Structure not correct
Nocardichelin	P	P	P	Nocardia sp.	Acta 3026	10.1021/np060612i	N	Y		Anticancer
Parabactin	ꭗ	P	P	Paracoccus dentrificans	ATCC19367	10.1016/S0021-9258(17)39542-X	N	Y
Vulnibactin	P	P	ꭗ	Vibrio vulnificus	M-2799	10.1007/BF00140480	Y	Y	Human
Nigribactin	P	P	P	Vibrio nigripulchritudo	S2604	10.3390/md10112584	Y	Y	Shrimp
Tetroazolemycin	P	P	P	Streptomyces olivaceus	FXJ8.012	10.3390/md11051524	N	Y			Strain identifier Streptomyces olivaceus NBRC 12805 and CGMCC 4.1369
Spoxazomicin	P	P	P	Streptosporangium oxazolinicum	K07-0460	10.1038/ja.2011.16	N	N		Antitrypanosomal, neuroprotective
Spoxazomicin	P	P	P	Streptomyces sp.	RM-14-6	10.1021/acs.jnatprod.6b00948	N	N		Antitrypanosomal, neuroprotective
2-Hydroxybenzamide	P	P	P	Streptomyces sp.	RM-14-6	10.1021/acs.jnatprod.6b00948	N	N
Asterobactin	P	P	ꭗ	Nocardia asteroides	IFM0959	10.7164/antibiotics.55.593	Y	Y	Human	Antibacterial Antiturmor	Statement regarding pathogenicity 10.1186/s12915-022-01452-7
Fimsbactin	P	P	P	Acinetobacter baumannii	ATCC17978	10.1002/cbic.201200764	Y	Y	Human
Fimsbactin	P	P	P	Acinetobacter baylyi	ADP1	10.1002/cbic.201200764	N	Y
Fluvibactin	P	P	ꭗ	Vibrio fluvialis	AQ 0012	10.1093/oxfordjournals.jbchem.a124079	Y	Y	Human	Antibacterial	reference antibacterial (10.1128/AEM.00730-16)
Acinetobactin	P	P	P	Acinetobacter baumannii	ATCC19606	10.1007/BF00301846	Y	Y	Human
Serratiochelin	P	P	P	Serratia marcescens	TW	10.1515/znc-1994-1-203	Y	Y	Human	Antiproliferation Antibacterial	reference antibacterial (10.3390/microorganisms8071042)
Serratiochelin	P	P	P	Serratia plymuthica	V4	10.1021/ja304941d	N	Y			Taxonomy adjusted (10.1128/genomea.00340-14)
Photobactin	P	P		Photorhabdus luminescens	NS414	10.1128/AEM.69.8.4706-4713.2003	Y	Y	Insect	Antibacterial
Attinimicin	P	P	P	Pseudonocardia sp.	ICBG1293	10.1021/acscentsci.0c00978	N	Y		Antifungal
Pseudonochelin	P	P	P	Pseudonocardia sp.	WMMC193	10.1021/acs.orglett.2c01408	N	Y		Antibacterial
Ecteinamine	P	P	P	Micromonospora sp.	WMMB482	10.1021/jacs.2c06410	N	N
Vibriobactin	P	P	P	Vibrio cholerae	O395	10.1021/bi001651a	Y	Y	Human
Yersiniabactin	ꭗ	ꭗ		Klebsiella pneumoniae		10.1099/mgen.0.000196	Y	Y	Human
Yersiniabactin	P	ꭗ	ꭗ	Escherichia coli	WT UTI89	10.1074/jbc.RA118.004483	Y	Y	Human
Photoxenobactin	P	P	P	Xenorhabdus szentirmaii	DSM 16338	10.1038/s41557-022-00923-2	N	N			Xenorhabdus are enthomopathogenic, but no evidence for this strain was tested
Sorangibactin	P	P	P	Pendulispora rubella	MSr11367	10.1021/acschembio.3c00063	N	Y
Anthrochelin	P	P	P	Luteibacter anthropi	DSM23190	10.1002/cbic.202300322	Y	Y	Human
Terpenibactin	P	P	P	Nocardia terpenica	IFM 0406	10.1002/cbic.202000062	N	Y		Muscarinic receptor binding inhibitor
Aeruginoic acid	P	P	ꭗ	Pseudomonas aeruginosa		10.1080/00021369.1970.10859668
Madurastatin	P	P	P	Actinomadura sp.	WMMA1423	10.1021/acs.orglett.9b02159	N	Y
Leptochelin	P	P	P	Leptothoe sp.	ISB3NOV94-8A	10.1021/jacs.4c05399	N	Y
Escherichelin	P	P	P	Escherichia coli	UTI89	10.1172/JCI92464	Y	Y	Human		inhibitor of the virulence-associated pyochelin siderophore system in Pseudomonas aeruginosa
Agrobactin	ꭗ	P	P	Agrobacterium tumefaciens	B6	10.1016/S0021-9258(17)37736-0	Y	Y	Plant
Karamomycin	P	P	P	Nonomuraea sp.	GW58/450	10.1021/acs.jnatprod.8b00928	N	N		Cytotoxic
Pseudochelin A	P	P	P	Pseudoalteromonas piscicida	EM138	10.1021/acs.jnatprod.4c00376	N	Y		Antibiofilm	First description of Pseudochelin A 10.1016/j.tet.2017.03.051
Frankobactin	P	P	P	Parafrankia sp.	CH37	10.1021/acs.jnatprod.0c01291	N	Y
Cyanochelin	P	P	P	Rivularia sp.	PCC 7116	10.1128/AEM.03128-20	N	Y
Photoxenobactin	P	P	~	Vibrio anguillarum	RV22	10.1021/acs.inorgchem.3c04076	Y	Y	Fish
Acinetobactin	P	P	ꭗ	Aeromonas salmonicida subsp. salmonicida	RSP74.1	10.1021/acschembio.5b00624	Y	Y	Fish
Catenulobactin	P	P	ꭗ	Catenuloplanes sp.	RD067331	10.1021/acs.jnatprod.8b00261	N	Y
Thiazostatin	P	P	P	Actinoplanes sp.	SE50/110	10.3389/fbioe.2024.1497138	N	N
Pyonitrin	P	P	ꭗ	Pseudomonas protegens		10.1021/jacs.9b09739	N	N
Pulicatin	P	P	P	Pantoea agglomerans	Pa	10.3390/biom10020268	N	N
Pulicatin	P	P	P	Streptomyces ardesiacus	NBU2966	10.1016/j.phytochem.2021.113078	N	N
Thiazostatin	P	P	P	Streptomyces ardesiacus	NBU2966	10.1016/j.phytochem.2021.113078	N	N
Spoxazomicin	P	P	P	Streptomyces ardesiacus	NBU2966	10.1016/j.phytochem.2021.113078	N	N
Anguibactin	P	P	P	Vibrio sp.	DS40M4	10.1021/np900750g	N	Y		Cytotoxic
Yersiniabactin	P	P	P	Escherichia coli	Nissle 1917	10.1038/s41467-021-27297-2	N	Y
